# Supplementary material for: Ets2 suppresses inflammatory cytokines through MAPK/NF-κB signaling and directly binds to the IL-6 promoter in macrophages
Source: publisher site journal article supplement (doi:10.18632/aging.102480), 2019-11-27
Supplement: Supplementary file [file aging-v11i22-102480-supplementary-material-SD1.pdf]

SUPPLEMENTARY FIGURES

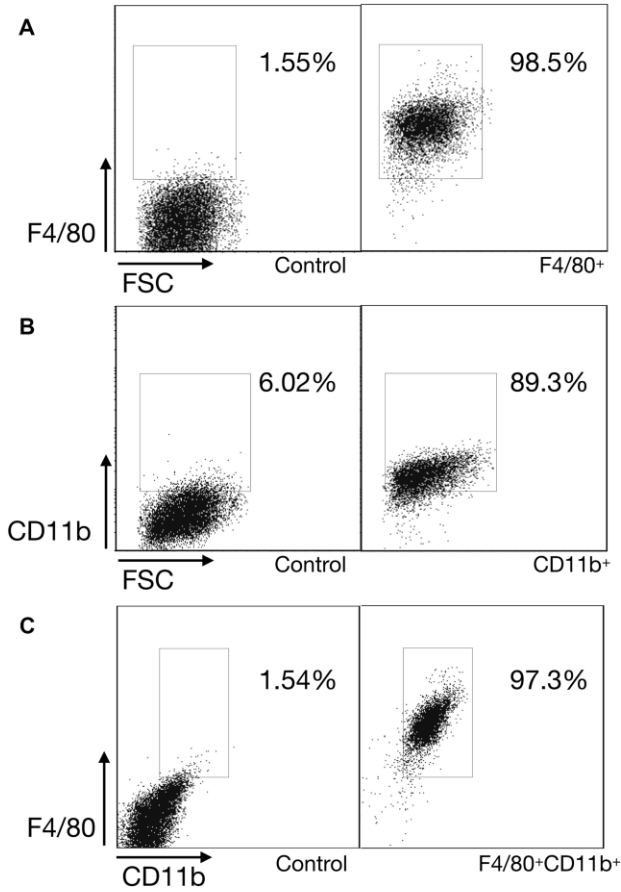

Supplementary Figure 1. Representatives of dot plots of peritoneal macrophage stained with F4/80 and CD11b in flow cytometry.

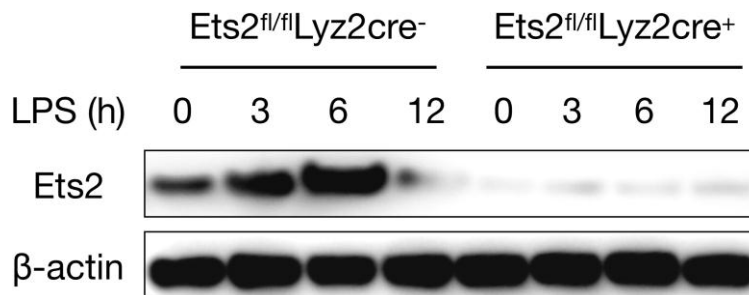

Supplementary Figure 2. Western blot of Ets2 and β-actin of Ets2-deficient (Ets2<sup>fl/fl</sup>Lyz2cre<sup>+</sup>) or wild-type (Ets2<sup>fl/fl</sup>Lyz2cre<sup>-</sup>) PMs stimulated with 100 ng/ml LPS in indicated times (0, 3, 6, 12 hours).

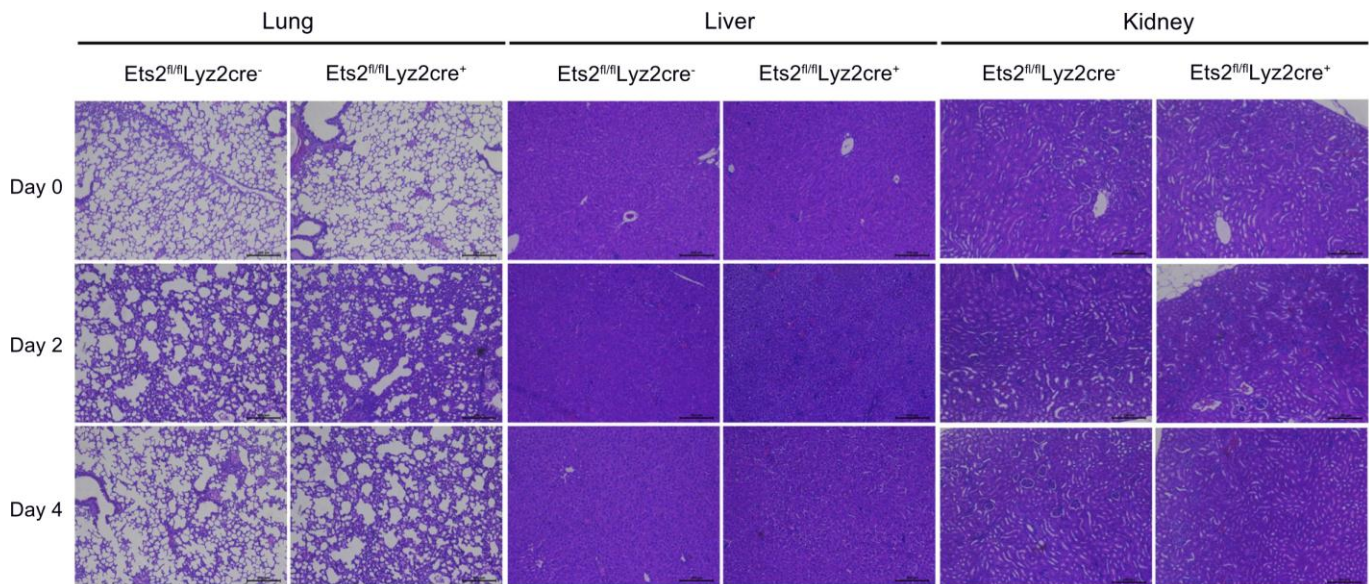

**Supplementary Figure 3.** Representatives of H&E staining of lung, liver and kidney in postoperative Day 2, and 4 of Ets2<sup>fl/fl</sup>Lyz2cre<sup>-</sup> or Ets2<sup>fl/fl</sup>Lyz2cre<sup>+</sup> mice underwent CLP surgery. Day 0 present the Sham surgery procedure.

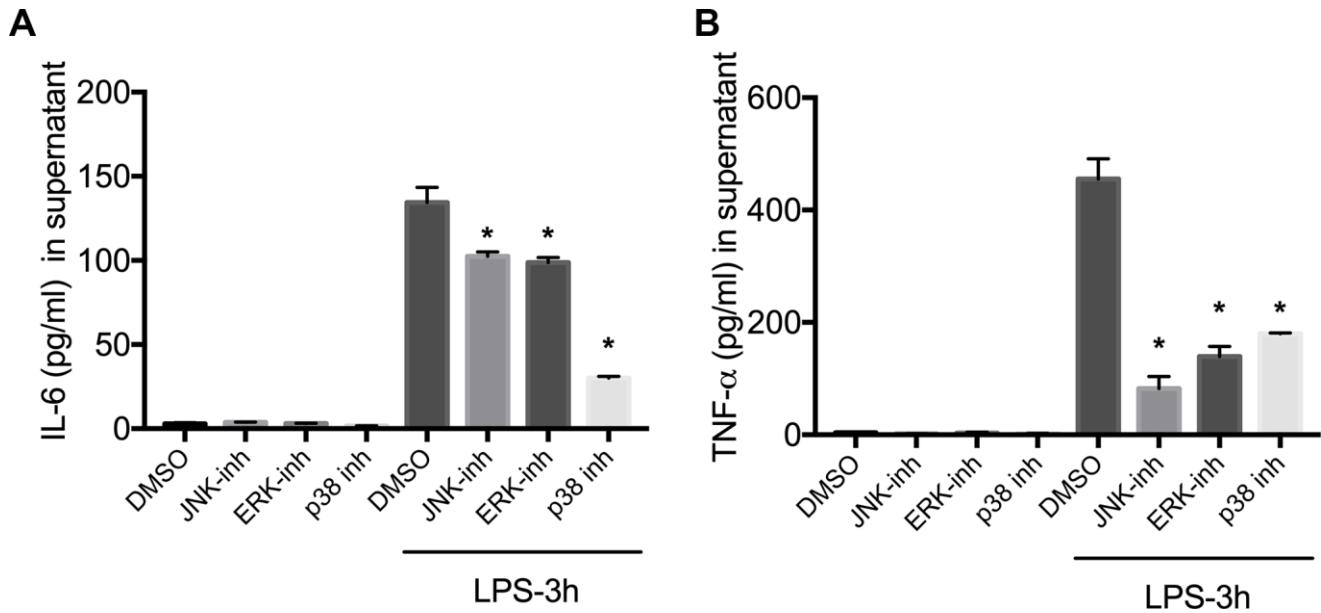

**Supplementary Figure 4.** (A, B) ELISA of IL-6 (A) and TNF-α in the supernatant of peritoneal macrophage pre-treated with DMSO or inhibitor of ERK, JNK, and p38 respectively and stimulated with LPS for 3h. Data are shown as the mean ± s.d. of three samples. Student's t-test compared with the DMSO. \*, P<0.05.

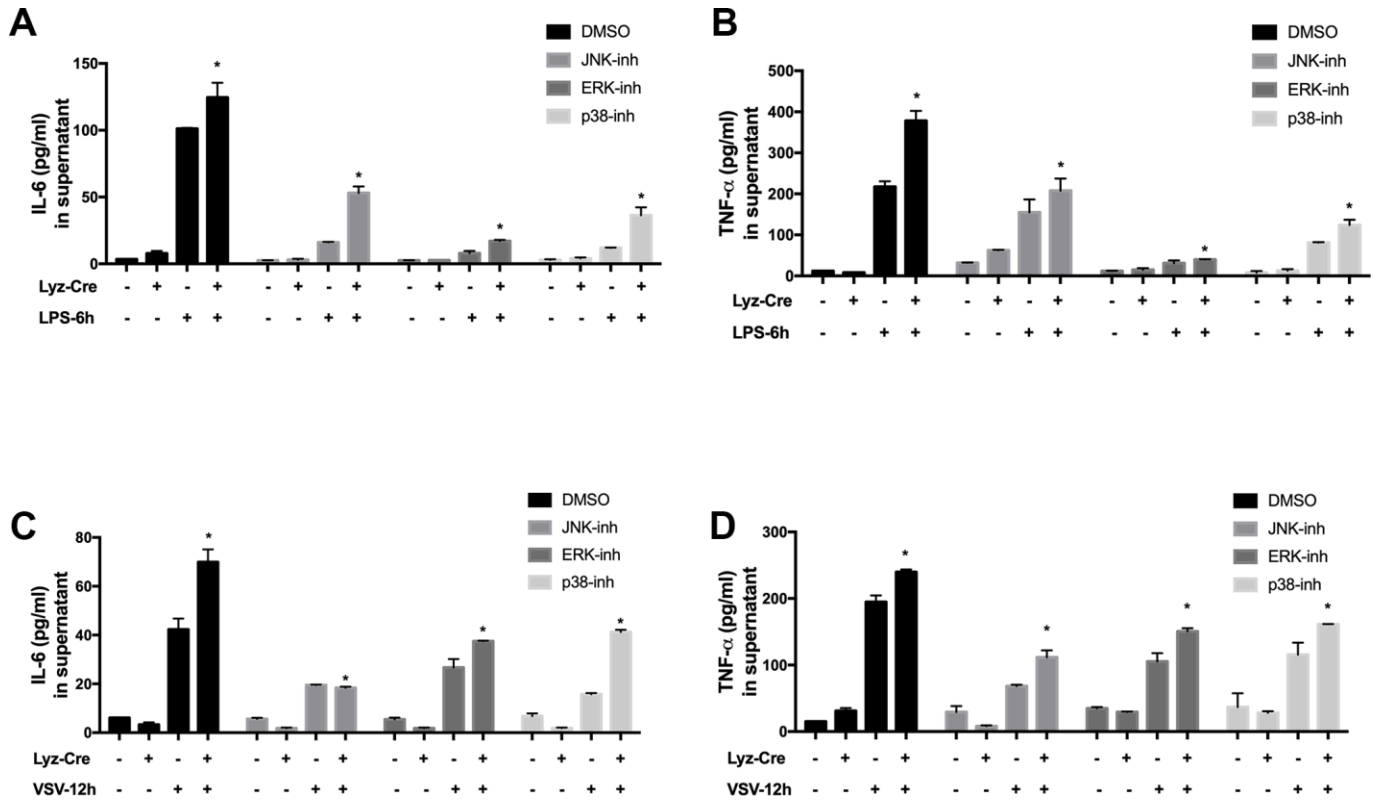

**Supplementary Figure 5.** (A–C) ELISA of IL-6 (A, C) and TNF- $\alpha$  (B, D) in the supernatant of peritoneal macrophage of *Ets2<sup>fl/fl</sup>Lyz2cre<sup>-</sup>* or *Ets2<sup>fl/fl</sup>Lyz2cre<sup>+</sup>* mice, pre-treated with DMSO or inhibitor of ERK, JNK, and p38 respectively and stimulated with 100 ng/ml LPS 6h (A, B) or 10 MOI VSV (C, D) for 12h. Data are shown as the mean  $\pm$  s.d. of three samples. Student's t-test compared with the DMSO. \*,  $P < 0.05$ .

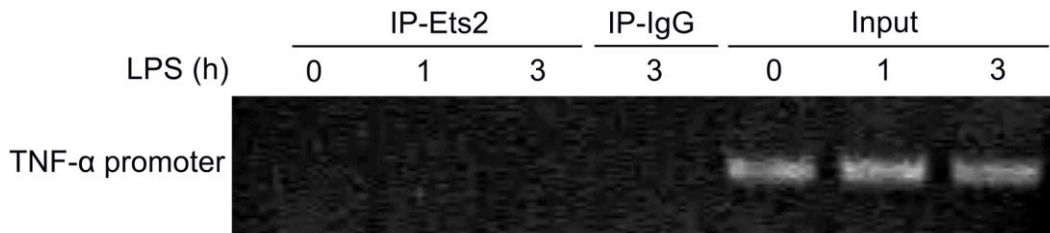

**Supplementary Figure 6.** ChIP analysis of the TNF- $\alpha$  promoter using an Ets2 antibody in mouse primary peritoneal macrophages treated with LPS for the indicated times.
